# Supplementary material for: A Deep Sequencing Approach to Comparatively Analyze the Transcriptome of Lifecycle Stages of the Filarial Worm, Brugia malayi
Source: PubMed Central journal article supplement (PMC3236722; doi:10.1371/journal.pntd.0001409), 2011-12-13

**Figure S1.** Histogram of raw read counts per gene model and scaling-normalized RPKM values. To facilitate transcript abundance comparisons between genes and stages, read counts were RPKM-transformed and TMM-normalized (see Methods). The distribution of transcript level estimates indicated 4 to 5 logs of dynamic range.

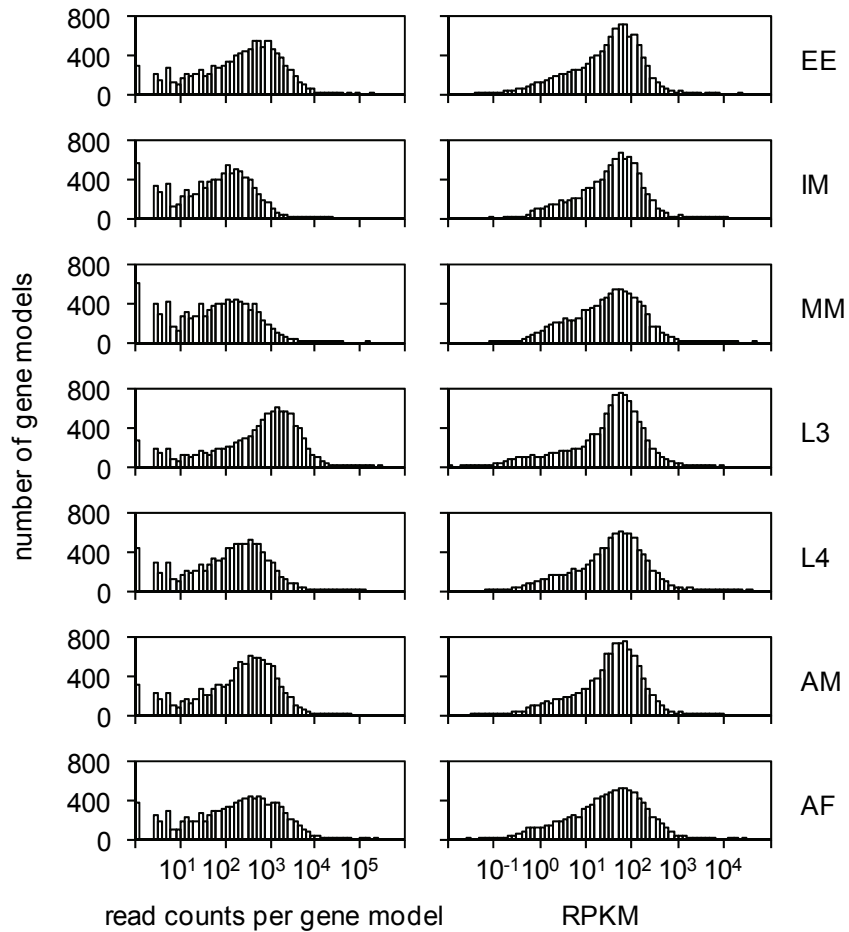

Supplement: pntd.0001409.s001.pdf [file pntd.0001409.s001.pdf]
