# Supplementary material for: A Deep Sequencing Approach to Comparatively Analyze the Transcriptome of Lifecycle Stages of the Filarial Worm, Brugia malayi
Source: PubMed Central journal article supplement (PMC3236722; doi:10.1371/journal.pntd.0001409), 2011-12-13

**Figure S2.** Genome-wide distribution of the dispersion parameter estimating stage-to-stage variability in transcript abundance. Based on the NB dispersion parameter, genes were ordered from the most variable to the least variable, and partitioned into four equal-sized groups as indicated by the horizontal dotted lines. GO term enrichment tests were performed on each of the four groups (Table S2).

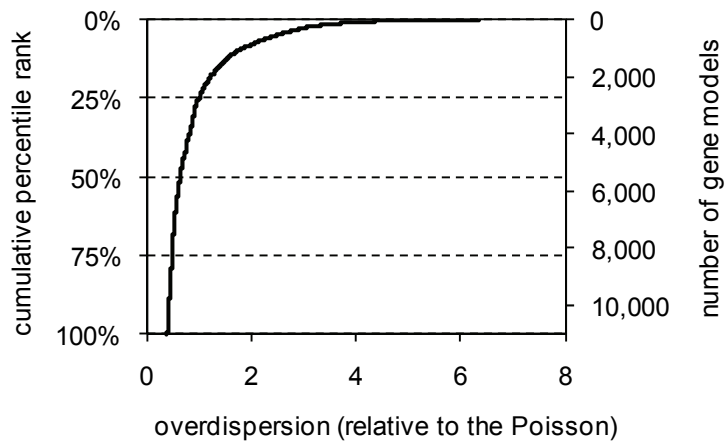

Supplement: pntd.0001409.s002.pdf [file pntd.0001409.s002.pdf]
