# Supplementary material for: A Deep Sequencing Approach to Comparatively Analyze the Transcriptome of Lifecycle Stages of the Filarial Worm, Brugia malayi
Source: PubMed Central journal article supplement (PMC3236722; doi:10.1371/journal.pntd.0001409), 2011-12-13

**Figure S3.** Venn diagram analysis to identify genes with female somatic tissue- or germline-enriched expression pattern. (1) genes with enriched expression in adult female relative to eggs & embryos; (2) genes with enriched expression in eggs & embryos relative to adult male; (3) genes with enriched expression in adult female and/or eggs & embryos relative to all other stages.

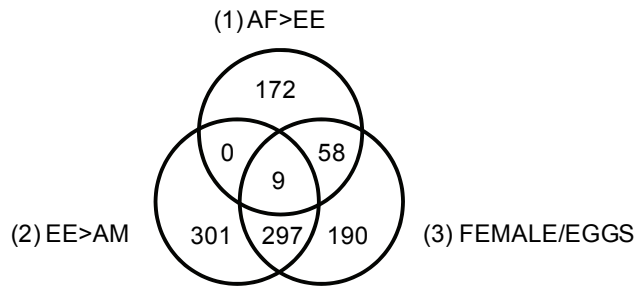

Supplement: pntd.0001409.s003.pdf [file pntd.0001409.s003.pdf]
