# Supplementary material for: A Deep Sequencing Approach to Comparatively Analyze the Transcriptome of Lifecycle Stages of the Filarial Worm, Brugia malayi
Source: PubMed Central journal article supplement (PMC3236722; doi:10.1371/journal.pntd.0001409), 2011-12-13
Supplement: pntd.0001409.s004.pdf [file pntd.0001409.s004.pdf]

**Table S1.** Total number of reads sequenced and mapped to the genome.

| library        | total sequenced | unambiguously mapped to |                     |
|----------------|-----------------|-------------------------|---------------------|
|                |                 | gene models             | unannotated regions |
| eggs & embryos | 13,522,277      | 7,549,405               | 1,068,846           |
| immature MF    | 11,829,651      | 1,614,177               | 178,388             |
| mature MF      | 7,979,044       | 2,393,380               | 163,257             |
| L3             | 27,021,114      | 18,143,064              | 2,003,074           |
| L4             | 14,467,007      | 5,055,440               | 282,023             |
| adult male     | 10,987,792      | 5,957,677               | 502,938             |
| adult female   | 18,345,242      | 7,884,405               | 502,388             |
|                | 104,152,127     | 48,597,548              | 4,700,914           |
