# Supplementary material for: A Deep Sequencing Approach to Comparatively Analyze the Transcriptome of Lifecycle Stages of the Filarial Worm, Brugia malayi
Source: PubMed Central journal article supplement (PMC3236722; doi:10.1371/journal.pntd.0001409), 2011-12-13
Supplement: pntd.0001409.s005.pdf [file pntd.0001409.s005.pdf]

**Table S2.** List of over-represented GO terms in groups of genes with different levels of overall variability in their transcript abundance across lifecycle stages. Genes were partitioned into four equal-sized groups designated as Q1 to 4 in the order of decreasing variability (Figure S2). Over-represented GO terms with p-value < 0.01 were included.

| Q1      | Q2      | Q3      | Q4      | GO terms                                                   |            |
|---------|---------|---------|---------|------------------------------------------------------------|------------|
|         |         |         |         | <b>cellular component</b>                                  |            |
|         |         | 6.5E-12 | 9.1E-04 | ribosome                                                   | GO:0005840 |
|         |         | 6.9E-05 |         | ribonucleoprotein complex                                  | GO:0030529 |
|         |         |         | 4.4E-07 | cytoplasm                                                  | GO:0005737 |
|         |         |         | 3.1E-05 | proteasome complex                                         | GO:0000502 |
|         |         |         | 6.3E-04 | mitochondrial inner membrane                               | GO:0005743 |
|         |         |         | 9.2E-04 | proteasome core complex                                    | GO:0005839 |
|         |         |         |         | <b>molecular function</b>                                  |            |
| 4.8E-12 |         |         |         | structural constituent of cuticle                          | GO:0042302 |
| 1.4E-10 |         |         |         | serine-type endopeptidase inhibitor activity               | GO:0004867 |
| 4.4E-06 |         |         |         | phosphoprotein phosphatase activity                        | GO:0004721 |
| 2.3E-05 |         |         |         | structural molecule activity                               | GO:0005198 |
| 5.8E-05 |         |         |         | cysteine-type peptidase activity                           | GO:0008234 |
| 8.7E-05 |         |         |         | protein kinase activity                                    | GO:0004672 |
| 2.0E-04 |         |         |         | hedgehog receptor activity                                 | GO:0008158 |
| 2.3E-04 |         |         |         | protein tyrosine kinase activity                           | GO:0004713 |
| 7.2E-04 |         |         |         | extracellular matrix structural constituent                | GO:0005201 |
|         | 4.8E-06 |         |         | RNA-directed DNA polymerase activity                       | GO:0003964 |
|         |         | 3.8E-11 |         | structural constituent of ribosome                         | GO:0003735 |
|         |         |         | 8.4E-10 | binding                                                    | GO:0005488 |
|         |         |         | 3.6E-09 | ligase activity                                            | GO:0016874 |
|         |         |         | 1.3E-06 | ATP binding                                                | GO:0005524 |
|         |         |         | 5.9E-06 | aminoacyl-tRNA ligase activity                             | GO:0004812 |
|         |         |         | 9.7E-06 | protein transporter activity                               | GO:0008565 |
|         |         |         | 4.1E-05 | 4 iron, 4 sulfur cluster binding                           | GO:0051539 |
|         |         |         | 5.2E-05 | nucleotide binding                                         | GO:0000166 |
|         |         |         | 5.8E-05 | acid-amino acid ligase activity                            | GO:0016881 |
|         |         |         | 1.3E-04 | unfolded protein binding                                   | GO:0051082 |
|         |         |         | 2.5E-04 | heat shock protein binding                                 | GO:0031072 |
|         |         |         | 6.6E-04 | helicase activity                                          | GO:0004386 |
|         |         |         | 8.3E-04 | endopeptidase activity                                     | GO:0004175 |
|         |         |         | 9.2E-04 | threonine-type endopeptidase activity                      | GO:0004298 |
|         |         |         |         | <b>biological process</b>                                  |            |
| 1.0E-04 |         |         |         | protein amino acid phosphorylation                         | GO:0006468 |
|         | 1.6E-07 |         |         | DNA integration                                            | GO:0015074 |
|         | 1.3E-05 |         |         | RNA-dependent DNA replication                              | GO:0006278 |
|         |         | 1.6E-07 | 1.3E-06 | translation                                                | GO:0006412 |
|         |         |         | 1.9E-07 | protein transport                                          | GO:0015031 |
|         |         |         | 7.4E-07 | intracellular protein transport                            | GO:0006886 |
|         |         |         | 8.9E-07 | protein folding                                            | GO:0006457 |
|         |         |         | 7.3E-05 | protein modification process                               | GO:0006464 |
|         |         |         | 9.9E-05 | tRNA aminoacylation for protein translation                | GO:0006418 |
|         |         |         | 5.1E-04 | ubiquitin-dependent protein catabolic process              | GO:0006511 |
|         |         |         | 5.1E-04 | protein catabolic process                                  | GO:0030163 |
|         |         |         | 5.2E-04 | regulation of actin filament polymerization                | GO:0030833 |
|         |         |         | 5.8E-04 | vesicle-mediated transport                                 | GO:0016192 |
|         |         |         | 9.2E-04 | proteolysis involved in cellular protein catabolic process | GO:0051603 |
