# Supplementary material for: A Deep Sequencing Approach to Comparatively Analyze the Transcriptome of Lifecycle Stages of the Filarial Worm, Brugia malayi
Source: PubMed Central journal article supplement (PMC3236722; doi:10.1371/journal.pntd.0001409), 2011-12-13
Supplement: pntd.0001409.s006.pdf [file pntd.0001409.s006.pdf]

**Table S3.** List of over-represented GO terms and their corresponding p-values among genes that show relative transcriptional enrichment in pairwise comparisons (Figure 3D). Female somatic tissue- and germline-enriched patterns were defined using Venn diagram analysis (Figure S3).

| Pairwise comparisons |                 | GO terms                 |                                            |                                              |                               |            |
|----------------------|-----------------|--------------------------|--------------------------------------------|----------------------------------------------|-------------------------------|------------|
| (1)                  | AM              | 1.2E-03                  | C                                          | cytoskeleton                                 | GO:0005856                    |            |
|                      |                 | 5.2E-03                  | C                                          | prefoldin complex                            | GO:0016272                    |            |
|                      |                 | 1.7E-12                  | F                                          | structural molecule activity                 | GO:0005198                    |            |
|                      |                 | 2.2E-11                  | F                                          | phosphoprotein phosphatase activity          | GO:0004721                    |            |
|                      |                 | 3.6E-07                  | F                                          | protein kinase activity                      | GO:0004672                    |            |
|                      |                 | 2.3E-06                  | F                                          | protein tyrosine phosphatase activity        | GO:0004725                    |            |
|                      |                 | 1.3E-05                  | F                                          | phosphatase activity                         | GO:0016791                    |            |
|                      |                 | 1.3E-04                  | F                                          | kinase activity                              | GO:0016301                    |            |
|                      |                 | 2.8E-03                  | F                                          | protein tyrosine kinase activity             | GO:0004713                    |            |
|                      |                 | 1.3E-06                  | P                                          | protein amino acid phosphorylation           | GO:0006468                    |            |
|                      |                 | 3.6E-06                  | P                                          | protein amino acid dephosphorylation         | GO:0006470                    |            |
|                      |                 | 1.6E-05                  | P                                          | dephosphorylation                            | GO:0016311                    |            |
|                      |                 | 5.2E-03                  | P                                          | cell differentiation                         | GO:0030154                    |            |
|                      |                 | AF                       | 5.4E-17                                    | C                                            | nucleus                       | GO:0005634 |
|                      |                 |                          | 5.6E-30                                    | F                                            | transcription factor activity | GO:0003700 |
|                      | 1.5E-25         |                          | F                                          | sequence-specific DNA binding                | GO:0043565                    |            |
|                      | 3.5E-14         |                          | F                                          | DNA binding                                  | GO:0003677                    |            |
|                      | 5.0E-11         |                          | F                                          | ligand-dependent nuclear receptor activity   | GO:0004879                    |            |
|                      | 7.8E-10         |                          | F                                          | steroid hormone receptor activity            | GO:0003707                    |            |
|                      | 4.3E-05         |                          | F                                          | receptor activity                            | GO:0004872                    |            |
| 5.7E-04              | F               |                          | transcription regulator activity           | GO:0030528                                   |                               |            |
| 2.7E-03              | F               |                          | transcription cofactor activity            | GO:0003712                                   |                               |            |
| 4.7E-03              | F               |                          | protein dimerization activity              | GO:0046983                                   |                               |            |
| 6.6E-03              | F               |                          | zinc ion binding                           | GO:0008270                                   |                               |            |
| 2.6E-27              | P               |                          | regulation of transcription, DNA-dependent | GO:0006355                                   |                               |            |
| 1.1E-18              | P               |                          | regulation of transcription                | GO:0045449                                   |                               |            |
| 4.6E-09              | P               |                          | transcription                              | GO:0006350                                   |                               |            |
| 4.2E-03              | P               |                          | multicellular organismal development       | GO:0007275                                   |                               |            |
| 6.6E-03              | P               | homophilic cell adhesion | GO:0007156                                 |                                              |                               |            |
| 8.5E-03              | P               | cell-matrix adhesion     | GO:0007160                                 |                                              |                               |            |
| (2)                  | somatic tissue  | 1.8E-04                  | F                                          | voltage-gated chloride channel activity      | GO:0005247                    |            |
|                      |                 | 4.9E-04                  | F                                          | structural constituent of cuticle            | GO:0042302                    |            |
|                      |                 | 7.8E-03                  | F                                          | lipid binding                                | GO:0008289                    |            |
|                      |                 | 1.8E-04                  | P                                          | chloride transport                           | GO:0006821                    |            |
|                      |                 | 7.6E-03                  | P                                          | proteolysis                                  | GO:0006508                    |            |
|                      | germline tissue | 5.0E-15                  | C                                          | nucleus                                      | GO:0005634                    |            |
|                      |                 | 1.0E-03                  | C                                          | plasma membrane                              | GO:0005886                    |            |
|                      |                 | 8.4E-03                  | C                                          | proteinaceous extracellular matrix           | GO:0005578                    |            |
|                      |                 | 1.9E-28                  | F                                          | transcription factor activity                | GO:0003700                    |            |
|                      |                 | 1.4E-26                  | F                                          | sequence-specific DNA binding                | GO:0043565                    |            |
|                      |                 | 3.1E-15                  | F                                          | DNA binding                                  | GO:0003677                    |            |
|                      |                 | 3.0E-10                  | F                                          | transcription regulator activity             | GO:0030528                    |            |
|                      |                 | 5.7E-09                  | F                                          | ligand-dependent nuclear receptor activity   | GO:0004879                    |            |
|                      |                 | 5.9E-07                  | F                                          | steroid hormone receptor activity            | GO:0003707                    |            |
|                      |                 | 2.8E-06                  | F                                          | serine-type endopeptidase inhibitor activity | GO:0004867                    |            |
|                      |                 | 1.4E-05                  | F                                          | structural constituent of cuticle            | GO:0042302                    |            |

|       |    |         |   |                                                                                          |            |
|-------|----|---------|---|------------------------------------------------------------------------------------------|------------|
|       |    | 1.5E-05 | F | receptor activity                                                                        | GO:0004872 |
|       |    | 1.1E-04 | F | calcium ion binding                                                                      | GO:0005509 |
|       |    | 1.2E-03 | F | metallopeptidase activity                                                                | GO:0008237 |
|       |    | 2.2E-03 | F | protein dimerization activity                                                            | GO:0046983 |
|       |    | 1.1E-25 | P | regulation of transcription, DNA-dependent                                               | GO:0006355 |
|       |    | 5.0E-25 | P | regulation of transcription                                                              | GO:0045449 |
|       |    | 9.0E-10 | P | transcription                                                                            | GO:0006350 |
|       |    | 7.1E-06 | P | homophilic cell adhesion                                                                 | GO:0007156 |
|       |    | 3.1E-05 | P | multicellular organismal development                                                     | GO:0007275 |
|       |    | 2.3E-03 | P | cell adhesion                                                                            | GO:0007155 |
|       |    | 5.9E-03 | P | Wnt receptor signaling pathway                                                           | GO:0016055 |
| <hr/> |    |         |   |                                                                                          |            |
| (3)   | IM | 8.0E-03 | C | proton-transporting ATP synthase complex, coupling factor F(o)                           | GO:0045263 |
|       |    | 1.8E-03 | F | asparagine-tRNA ligase activity                                                          | GO:0004816 |
|       |    | 2.5E-03 | F | hydrogen ion transporting ATP synthase activity, rotational mechanism                    | GO:0046933 |
|       |    | 7.4E-03 | F | exodeoxyribonuclease III activity                                                        | GO:0008853 |
|       |    | 9.4E-03 | F | cytidine deaminase activity                                                              | GO:0004126 |
|       |    | 1.8E-03 | P | asparaginyl-tRNA aminoacylation                                                          | GO:0006421 |
|       |    | 9.4E-03 | P | cytidine metabolic process                                                               | GO:0046087 |
|       | MM | 1.8E-05 | C | cytoskeleton                                                                             | GO:0005856 |
|       |    | 5.8E-04 | F | structural molecule activity                                                             | GO:0005198 |
| <hr/> |    |         |   |                                                                                          |            |
| (4)   | L3 | 5.4E-03 | C | membrane                                                                                 | GO:0016020 |
|       |    | 2.0E-08 | F | cysteine-type peptidase activity                                                         | GO:0008234 |
|       |    | 1.3E-07 | F | cysteine-type endopeptidase activity                                                     | GO:0004197 |
|       |    | 5.7E-04 | F | serine-type endopeptidase inhibitor activity                                             | GO:0004867 |
|       |    | 3.0E-03 | F | magnesium ion binding                                                                    | GO:0000287 |
|       |    | 3.5E-03 | F | hedgehog receptor activity                                                               | GO:0008158 |
|       |    | 5.8E-03 | F | oxidoreductase activity                                                                  | GO:0016491 |
|       |    | 8.6E-03 | F | oxidoreductase activity,<br>acting on the CH-OH group of donors, NAD or NADP as acceptor | GO:0016616 |
|       |    | 8.6E-03 | F | ion channel activity                                                                     | GO:0005216 |
|       |    | 9.8E-04 | P | proteolysis                                                                              | GO:0006508 |
|       |    | 2.3E-03 | P | oxidation reduction                                                                      | GO:0055114 |
|       |    | 9.6E-03 | P | metabolic process                                                                        | GO:0008152 |
|       | L4 | 1.8E-08 | F | structural constituent of cuticle                                                        | GO:0042302 |
|       |    | 1.8E-03 | P | cellular component organization                                                          | GO:0016043 |
|       |    | 7.5E-03 | P | response to oxidative stress                                                             | GO:0006979 |
|       |    | 9.5E-03 | P | regulation of transcription, DNA-dependent                                               | GO:0006355 |
